# Supplementary material for: Solvent induced channel interference in the two-photon absorption process—a theoretical study with a generalized few-state-model in three dimensions
Source: Royal Society of Chemistry journal article supplement (doi:10.1039/c1cp22849h), 2011-12-01
Supplement: c1cp22849h.pdf [file c1cp22849h.pdf]

## Supporting Information File

# Solvent Induced Channel Interference in Two-Photon Absorption Process - A theoretical study with generalized few-states-model in three dimensions

Md. Mehboob Alam,<sup>a</sup> Mausumi Chattopadhyaya,<sup>a</sup> and Swapan Chakrabarti<sup>\*a</sup>

<sup>a</sup>Department of Chemistry, University of Calcutta, 92 A.P.C Road, Kolkata - 700009

### Contents

- 1) Derivation of Generalized few-states model for calculating Two-Photon transition probability in three dimensional molecules
- 2) Optimized geometry of ortho- and para-betain in gas, water and acetonitrile solvents at CAM-B3LYP/6-311++G(d,p) level of theory (Table 1a,b and Table 2a,b)
- 3) Excited-Excited states transition moments of ortho- and para-betain in gas, THF, CH<sub>3</sub>CN and water medium (calculated at CAMB3LYP/aug-cc-pVDZ level of theory) (Table 3)
- 4) SOS result involving different number of intermediate states (Table 4)
- 5) Excitation energy of o- and p-betain in water medium calculated at CAMB3LYP/aug-cc-pVDZ and LC-PBE/aug-cc-pVDZ level of theory (Table 5)

## 1 Derivation of Generalized Few-States Model formula

The TPA tensor elements  $S_{\alpha\beta}$  is given by -

$$S_{\alpha\beta} = \sum_i \left( \frac{\mu_{\alpha}^{0i} \mu_{\beta}^{if}}{\Delta E_i} + \frac{\mu_{\beta}^{0i} \mu_{\alpha}^{if}}{\Delta E_i} \right) (\alpha, \beta = x, y, z)$$

Where  $\Delta E_i = \omega_i - \frac{\omega_f}{2}$ ,  $\omega_m$  = excitation energy for excitation from ground  $\langle 0|$  to excited state  $|m\rangle$ . In the above summation the sum runs over all the states including ground state. If we consider that the involved states are  $i, j, k, \dots, n$  then the explicit expression of  $S_{\alpha\beta}$  becomes -

$$S_{xx} = \frac{2\mu_x^{0i} \mu_x^{if}}{\Delta E_i} + \frac{2\mu_x^{0j} \mu_x^{jf}}{\Delta E_j} + \dots + \frac{2\mu_x^{0n} \mu_x^{nf}}{\Delta E_n}$$

$$S_{yy} = \frac{2\mu_y^{0i} \mu_y^{if}}{\Delta E_i} + \frac{2\mu_y^{0j} \mu_y^{jf}}{\Delta E_j} + \dots + \frac{2\mu_y^{0n} \mu_y^{nf}}{\Delta E_n}$$

$$S_{zz} = \frac{2\mu_z^{0i} \mu_z^{if}}{\Delta E_i} + \frac{2\mu_z^{0j} \mu_z^{jf}}{\Delta E_j} + \dots + \frac{2\mu_z^{0n} \mu_z^{nf}}{\Delta E_n}$$

$$S_{xy} = \frac{\mu_x^{0i} \mu_y^{if} + \mu_y^{0i} \mu_x^{if}}{\Delta E_i} + \frac{\mu_x^{0j} \mu_y^{jf} + \mu_y^{0j} \mu_x^{jf}}{\Delta E_j} + \dots + \frac{\mu_x^{0n} \mu_y^{nf} + \mu_y^{0n} \mu_x^{nf}}{\Delta E_n}$$

$$S_{yz} = \frac{\mu_y^{0i} \mu_z^{if} + \mu_z^{0i} \mu_y^{if}}{\Delta E_i} + \frac{\mu_y^{0j} \mu_z^{jf} + \mu_z^{0j} \mu_y^{jf}}{\Delta E_j} + \dots + \frac{\mu_y^{0n} \mu_z^{nf} + \mu_z^{0n} \mu_y^{nf}}{\Delta E_n}$$

$$S_{xz} = \frac{\mu_x^{0i} \mu_z^{if} + \mu_z^{0i} \mu_x^{if}}{\Delta E_i} + \frac{\mu_x^{0j} \mu_z^{jf} + \mu_z^{0j} \mu_x^{jf}}{\Delta E_j} + \dots + \frac{\mu_x^{0n} \mu_z^{nf} + \mu_z^{0n} \mu_x^{nf}}{\Delta E_n}$$

For a monochromatic linearly polarized light beam the TPA transition probability (in a.u.) is given by the expression -

$$\delta_{TP} = 6(S_{xx}^2 + S_{yy}^2 + S_{zz}^2) + 8(S_{xy}^2 + S_{yz}^2 + S_{xz}^2) + 4(S_{xx}S_{yy} + S_{yy}S_{zz} + S_{xx}S_{zz})$$

$$\begin{aligned} \delta_{TP} = & 6 \left( \frac{2\mu_x^{0i}\mu_x^{if}}{\Delta E_i} + \frac{2\mu_x^{0j}\mu_x^{jf}}{\Delta E_j} + \dots + \frac{2\mu_x^{0n}\mu_x^{nf}}{\Delta E_n} \right)^2 + 6 \left( \frac{2\mu_y^{0i}\mu_y^{if}}{\Delta E_i} + \frac{2\mu_y^{0j}\mu_y^{jf}}{\Delta E_j} + \dots + \frac{2\mu_y^{0n}\mu_y^{nf}}{\Delta E_n} \right)^2 \\ & + 6 \left( \frac{2\mu_z^{0i}\mu_z^{if}}{\Delta E_i} + \frac{2\mu_z^{0j}\mu_z^{jf}}{\Delta E_j} + \dots + \frac{2\mu_z^{0n}\mu_z^{nf}}{\Delta E_n} \right)^2 \\ & + 8 \left( \frac{\mu_x^{0i}\mu_y^{if} + \mu_y^{0i}\mu_x^{if}}{\Delta E_i} + \frac{\mu_x^{0j}\mu_y^{jf} + \mu_y^{0j}\mu_x^{jf}}{\Delta E_j} + \dots + \frac{\mu_x^{0n}\mu_y^{nf} + \mu_y^{0n}\mu_x^{nf}}{\Delta E_n} \right)^2 \\ & + 8 \left( \frac{\mu_y^{0i}\mu_z^{if} + \mu_z^{0i}\mu_y^{if}}{\Delta E_i} + \frac{\mu_y^{0j}\mu_z^{jf} + \mu_z^{0j}\mu_y^{jf}}{\Delta E_j} + \dots + \frac{\mu_y^{0n}\mu_z^{nf} + \mu_z^{0n}\mu_y^{nf}}{\Delta E_n} \right)^2 \\ & + 8 \left( \frac{\mu_x^{0i}\mu_z^{if} + \mu_z^{0i}\mu_x^{if}}{\Delta E_i} + \frac{\mu_x^{0j}\mu_z^{jf} + \mu_z^{0j}\mu_x^{jf}}{\Delta E_j} + \dots + \frac{\mu_x^{0n}\mu_z^{nf} + \mu_z^{0n}\mu_x^{nf}}{\Delta E_n} \right)^2 \\ & + 4 \left( \frac{2\mu_x^{0i}\mu_x^{if}}{\Delta E_i} + \frac{2\mu_x^{0j}\mu_x^{jf}}{\Delta E_j} + \dots + \frac{2\mu_x^{0n}\mu_x^{nf}}{\Delta E_n} \right) \left( \frac{2\mu_y^{0i}\mu_y^{if}}{\Delta E_i} + \frac{2\mu_y^{0j}\mu_y^{jf}}{\Delta E_j} + \dots + \frac{2\mu_y^{0n}\mu_y^{nf}}{\Delta E_n} \right) \\ & + 4 \left( \frac{2\mu_y^{0i}\mu_y^{if}}{\Delta E_i} + \frac{2\mu_y^{0j}\mu_y^{jf}}{\Delta E_j} + \dots + \frac{2\mu_y^{0n}\mu_y^{nf}}{\Delta E_n} \right) \left( \frac{2\mu_z^{0i}\mu_z^{if}}{\Delta E_i} + \frac{2\mu_z^{0j}\mu_z^{jf}}{\Delta E_j} + \dots + \frac{2\mu_z^{0n}\mu_z^{nf}}{\Delta E_n} \right) \\ & + 4 \left( \frac{2\mu_x^{0i}\mu_x^{if}}{\Delta E_i} + \frac{2\mu_x^{0j}\mu_x^{jf}}{\Delta E_j} + \dots + \frac{2\mu_x^{0n}\mu_x^{nf}}{\Delta E_n} \right) \left( \frac{2\mu_z^{0i}\mu_z^{if}}{\Delta E_i} + \frac{2\mu_z^{0j}\mu_z^{jf}}{\Delta E_j} + \dots + \frac{2\mu_z^{0n}\mu_z^{nf}}{\Delta E_n} \right) \end{aligned}$$

$$\begin{aligned}
 \delta_{TP} = & 6 \sum_i^n \left[ \left( \frac{2\mu_x^{0i} \mu_x^{if}}{\Delta E_i} \right)^2 + \left( \frac{2\mu_y^{0i} \mu_y^{if}}{\Delta E_i} \right)^2 + \left( \frac{2\mu_z^{0i} \mu_z^{if}}{\Delta E_i} \right)^2 \right] \\
 & + 8 \sum_i^n \left[ \left( \frac{\mu_x^{0i} \mu_y^{if} + \mu_y^{0i} \mu_x^{if}}{\Delta E_i} \right)^2 + \left( \frac{\mu_y^{0i} \mu_z^{if} + \mu_z^{0i} \mu_y^{if}}{\Delta E_i} \right)^2 + \left( \frac{\mu_x^{0i} \mu_z^{if} + \mu_z^{0i} \mu_x^{if}}{\Delta E_i} \right)^2 \right] \\
 & + 4 \sum_i^n \left[ \left( \frac{2\mu_x^{0i} \mu_x^{if}}{\Delta E_i} \times \frac{2\mu_y^{0i} \mu_y^{if}}{\Delta E_i} \right) + \left( \frac{2\mu_y^{0i} \mu_y^{if}}{\Delta E_i} \times \frac{2\mu_z^{0i} \mu_z^{if}}{\Delta E_i} \right) + \left( \frac{2\mu_x^{0i} \mu_x^{if}}{\Delta E_i} \times \frac{2\mu_z^{0i} \mu_z^{if}}{\Delta E_i} \right) \right] \\
 & + 6 \left( \frac{8\mu_x^{0i} \mu_x^{if} \mu_x^{0j} \mu_x^{jf}}{\Delta E_i \Delta E_j} + \frac{8\mu_x^{0i} \mu_x^{if} \mu_x^{0k} \mu_x^{kf}}{\Delta E_i \Delta E_k} + \dots + \frac{8\mu_x^{0i} \mu_x^{if} \mu_x^{0n} \mu_x^{nf}}{\Delta E_i \Delta E_n} \right) \\
 & + 6 \left( \frac{8\mu_x^{0j} \mu_x^{jf} \mu_x^{0k} \mu_x^{kf}}{\Delta E_j \Delta E_k} + \frac{8\mu_x^{0j} \mu_x^{jf} \mu_x^{0l} \mu_x^{lf}}{\Delta E_j \Delta E_l} + \dots + \frac{8\mu_x^{0j} \mu_x^{jf} \mu_x^{0n} \mu_x^{nf}}{\Delta E_j \Delta E_n} \right) + \dots \\
 & + 6 \left( \frac{8\mu_y^{0i} \mu_y^{if} \mu_y^{0j} \mu_y^{jf}}{\Delta E_i \Delta E_j} + \frac{8\mu_y^{0i} \mu_y^{if} \mu_y^{0k} \mu_y^{kf}}{\Delta E_i \Delta E_k} + \dots + \frac{8\mu_y^{0i} \mu_y^{if} \mu_y^{0n} \mu_y^{nf}}{\Delta E_i \Delta E_n} \right) \\
 & + 6 \left( \frac{8\mu_y^{0j} \mu_y^{jf} \mu_y^{0k} \mu_y^{kf}}{\Delta E_j \Delta E_k} + \frac{8\mu_y^{0j} \mu_y^{jf} \mu_y^{0l} \mu_y^{lf}}{\Delta E_j \Delta E_l} + \dots + \frac{8\mu_y^{0j} \mu_y^{jf} \mu_y^{0n} \mu_y^{nf}}{\Delta E_j \Delta E_n} \right) + \dots \\
 & + 6 \left( \frac{8\mu_z^{0i} \mu_z^{if} \mu_z^{0j} \mu_z^{jf}}{\Delta E_i \Delta E_j} + \frac{8\mu_z^{0i} \mu_z^{if} \mu_z^{0k} \mu_z^{kf}}{\Delta E_i \Delta E_k} + \dots + \frac{8\mu_z^{0i} \mu_z^{if} \mu_z^{0n} \mu_z^{nf}}{\Delta E_i \Delta E_n} \right) \\
 & + 6 \left( \frac{8\mu_z^{0j} \mu_z^{jf} \mu_z^{0k} \mu_z^{kf}}{\Delta E_j \Delta E_k} + \frac{8\mu_z^{0j} \mu_z^{jf} \mu_z^{0l} \mu_z^{lf}}{\Delta E_j \Delta E_l} + \dots + \frac{8\mu_z^{0j} \mu_z^{jf} \mu_z^{0n} \mu_z^{nf}}{\Delta E_j \Delta E_n} \right) + \dots \\
 & + 8 \left( \frac{2(\mu_x^{0i} \mu_y^{if} + \mu_y^{0i} \mu_x^{if})(\mu_x^{0j} \mu_y^{jf} + \mu_y^{0j} \mu_x^{jf})}{\Delta E_i \Delta E_j} + \frac{2(\mu_x^{0i} \mu_y^{if} + \mu_y^{0i} \mu_x^{if})(\mu_x^{0k} \mu_y^{kf} + \mu_y^{0k} \mu_x^{kf})}{\Delta E_i \Delta E_k} + \dots \right. \\
 & \quad \left. \dots + \frac{2(\mu_x^{0i} \mu_y^{if} + \mu_y^{0i} \mu_x^{if})(\mu_x^{0n} \mu_y^{nf} + \mu_y^{0n} \mu_x^{nf})}{\Delta E_i \Delta E_n} \right) \\
 & + 8 \left( \frac{2(\mu_x^{0j} \mu_y^{jf} + \mu_y^{0j} \mu_x^{jf})(\mu_x^{0k} \mu_y^{kf} + \mu_y^{0k} \mu_x^{kf})}{\Delta E_j \Delta E_k} + \frac{2(\mu_x^{0j} \mu_y^{jf} + \mu_y^{0j} \mu_x^{jf})(\mu_x^{0l} \mu_y^{lf} + \mu_y^{0l} \mu_x^{lf})}{\Delta E_j \Delta E_l} + \dots \right. \\
 & \quad \left. \dots + \frac{2(\mu_x^{0j} \mu_y^{jf} + \mu_y^{0j} \mu_x^{jf})(\mu_x^{0n} \mu_y^{nf} + \mu_y^{0n} \mu_x^{nf})}{\Delta E_j \Delta E_n} \right) + \dots \\
 & + 8 \left( \frac{2(\mu_y^{0i} \mu_z^{if} + \mu_z^{0i} \mu_y^{if})(\mu_y^{0j} \mu_z^{jf} + \mu_z^{0j} \mu_y^{jf})}{\Delta E_i \Delta E_j} + \frac{2(\mu_y^{0i} \mu_z^{if} + \mu_z^{0i} \mu_y^{if})(\mu_y^{0k} \mu_z^{kf} + \mu_z^{0k} \mu_y^{kf})}{\Delta E_i \Delta E_k} + \dots \right. \\
 & \quad \left. \dots + \frac{2(\mu_y^{0i} \mu_z^{if} + \mu_z^{0i} \mu_y^{if})(\mu_y^{0n} \mu_z^{nf} + \mu_z^{0n} \mu_y^{nf})}{\Delta E_i \Delta E_n} \right) \\
 & + 8 \left( \frac{2(\mu_y^{0j} \mu_z^{jf} + \mu_z^{0j} \mu_y^{jf})(\mu_y^{0k} \mu_z^{kf} + \mu_z^{0k} \mu_y^{kf})}{\Delta E_j \Delta E_k} + \frac{2(\mu_y^{0j} \mu_z^{jf} + \mu_z^{0j} \mu_y^{jf})(\mu_y^{0l} \mu_z^{lf} + \mu_z^{0l} \mu_y^{lf})}{\Delta E_j \Delta E_l} + \dots \right. \\
 & \quad \left. \dots + \frac{2(\mu_y^{0j} \mu_z^{jf} + \mu_z^{0j} \mu_y^{jf})(\mu_y^{0n} \mu_z^{nf} + \mu_z^{0n} \mu_y^{nf})}{\Delta E_j \Delta E_n} \right) + \dots
 \end{aligned}$$

$$\begin{aligned}
 &+ 8 \left( \frac{2(\mu_x^{0i} \mu_z^{if} + \mu_z^{0i} \mu_x^{if})(\mu_x^{0j} \mu_z^{jf} + \mu_z^{0j} \mu_x^{jf})}{\Delta E_i \Delta E_j} + \frac{2(\mu_x^{0i} \mu_z^{if} + \mu_z^{0i} \mu_x^{if})(\mu_x^{0k} \mu_z^{kf} + \mu_z^{0k} \mu_x^{kf})}{\Delta E_i \Delta E_k} + \dots \right. \\
 &\quad \left. \dots + \frac{2(\mu_x^{0i} \mu_z^{if} + \mu_z^{0i} \mu_x^{if})(\mu_x^{0n} \mu_z^{nf} + \mu_z^{0n} \mu_x^{nf})}{\Delta E_i \Delta E_n} \right) \\
 &+ 8 \left( \frac{2(\mu_x^{0j} \mu_z^{jf} + \mu_z^{0j} \mu_x^{jf})(\mu_x^{0k} \mu_z^{kf} + \mu_z^{0k} \mu_x^{kf})}{\Delta E_j \Delta E_k} + \frac{2(\mu_x^{0j} \mu_z^{jf} + \mu_z^{0j} \mu_x^{jf})(\mu_x^{0l} \mu_z^{lf} + \mu_z^{0l} \mu_x^{lf})}{\Delta E_j \Delta E_l} + \dots \right. \\
 &\quad \left. \dots + \frac{2(\mu_x^{0j} \mu_z^{jf} + \mu_z^{0j} \mu_x^{jf})(\mu_x^{0n} \mu_z^{nf} + \mu_z^{0n} \mu_x^{nf})}{\Delta E_j \Delta E_n} \right) + \dots \\
 &+ 4 \sum_{i,j(\neq i)}^n \left( \frac{4\mu_x^{0i} \mu_z^{if} \mu_y^{0j} \mu_y^{jf}}{\Delta E_i \Delta E_j} + \frac{4\mu_y^{0i} \mu_y^{if} \mu_z^{0j} \mu_z^{jf}}{\Delta E_i \Delta E_j} + \frac{4\mu_x^{0i} \mu_x^{if} \mu_z^{0j} \mu_z^{jf}}{\Delta E_i \Delta E_j} \right)
 \end{aligned}$$

The first three terms constitute the three-state model (3SM) formula  $\delta_{TP}^{ii}$  whereas the remaining terms constitute the interference terms  $\delta_{TP}^{ij}$ . Therefore the overall  $\delta_{TP}$  can be written as -

$$\delta_{TP} = \sum_i^n \delta_{TP}^{ii} + \sum_{i,j(\neq i)}^n \delta_{TP}^{ij}$$

Let us first derive the 3SM formula - for this we shall consider the excitation from ground  $\langle 0|$  to final state  $|f\rangle$  via the intermediate state  $|i\rangle$ . Therefore, for this case the  $\delta_{TP}^{3SM}$  may be written as -

$$\begin{aligned}
 \delta_{TP}^{3SM} = &6 \left[ \left( \frac{2\mu_x^{0i} \mu_x^{if}}{\Delta E_i} \right)^2 + \left( \frac{2\mu_y^{0i} \mu_y^{if}}{\Delta E_i} \right)^2 + \left( \frac{2\mu_z^{0i} \mu_z^{if}}{\Delta E_i} \right)^2 \right] \\
 &+ 8 \left[ \left( \frac{\mu_x^{0i} \mu_y^{if} + \mu_y^{0i} \mu_x^{if}}{\Delta E_i} \right)^2 + \left( \frac{\mu_y^{0i} \mu_z^{if} + \mu_z^{0i} \mu_y^{if}}{\Delta E_i} \right)^2 + \left( \frac{\mu_x^{0i} \mu_z^{if} + \mu_z^{0i} \mu_x^{if}}{\Delta E_i} \right)^2 \right] \\
 &+ 4 \left[ \left( \frac{2\mu_x^{0i} \mu_x^{if}}{\Delta E_i} \times \frac{2\mu_y^{0i} \mu_y^{if}}{\Delta E_i} \right) + \left( \frac{2\mu_y^{0i} \mu_y^{if}}{\Delta E_i} \times \frac{2\mu_z^{0i} \mu_z^{if}}{\Delta E_i} \right) + \left( \frac{2\mu_x^{0i} \mu_x^{if}}{\Delta E_i} \times \frac{2\mu_z^{0i} \mu_z^{if}}{\Delta E_i} \right) \right]
 \end{aligned}$$

$$\begin{aligned}
 \delta_{TP}^{3SM} = &\frac{8}{\Delta E_i^2} \left[ 3\{(\mu_x^{0i} \mu_x^{if})^2 + (\mu_y^{0i} \mu_y^{if})^2 + (\mu_z^{0i} \mu_z^{if})^2\} + (\mu_x^{0i} \mu_y^{if})^2 + (\mu_y^{0i} \mu_x^{if})^2 + 2\mu_x^{0i} \mu_x^{if} \mu_y^{0i} \mu_y^{if} \right. \\
 &+ (\mu_x^{0i} \mu_z^{if})^2 + (\mu_z^{0i} \mu_x^{if})^2 + 2\mu_x^{0i} \mu_z^{if} \mu_z^{0i} \mu_x^{if} + (\mu_y^{0i} \mu_z^{if})^2 + (\mu_z^{0i} \mu_y^{if})^2 + 2\mu_y^{0i} \mu_z^{if} \mu_z^{0i} \mu_y^{if} \\
 &\left. + 2\mu_x^{0i} \mu_x^{if} \mu_y^{0i} \mu_y^{if} + 2\mu_x^{0i} \mu_x^{if} \mu_z^{0i} \mu_z^{if} + 2\mu_y^{0i} \mu_y^{if} \mu_z^{0i} \mu_z^{if} \right]
 \end{aligned}$$

$$\delta_{TP}^{3SM} = \frac{8}{\Delta E_i^2} \left[ 4(\mu_x^{0i} \mu_x^{if} \mu_y^{0i} \mu_y^{if} + \mu_x^{0i} \mu_x^{if} \mu_z^{0i} \mu_z^{if} + \mu_y^{0i} \mu_y^{if} \mu_z^{0i} \mu_z^{if}) + 2\{(\mu_x^{0i} \mu_x^{if})^2 + (\mu_y^{0i} \mu_y^{if})^2 + (\mu_z^{0i} \mu_z^{if})^2\} \right. \\ \left. + (\mu_x^{0i})^2\{(\mu_x^{if})^2 + (\mu_y^{if})^2 + (\mu_z^{if})^2\} + (\mu_y^{0i})^2\{(\mu_x^{if})^2 + (\mu_y^{if})^2 + (\mu_z^{if})^2\} \right. \\ \left. + (\mu_z^{0i})^2\{(\mu_x^{if})^2 + (\mu_y^{if})^2 + (\mu_z^{if})^2\} \right]$$

$$\delta_{TP}^{3SM} = \frac{8}{\Delta E_i^2} \left[ 2(\mu_x^{0i} \mu_x^{if} + \mu_y^{0i} \mu_y^{if} + \mu_z^{0i} \mu_z^{if})^2 + \{(\mu_x^{if})^2 + (\mu_y^{if})^2 + (\mu_z^{if})^2\} \{(\mu_x^{0i})^2 + (\mu_y^{0i})^2 + (\mu_z^{0i})^2\} \right]$$

$$\delta_{TP}^{3SM} = \frac{8}{\Delta E_i^2} \left[ 2 \left( \vec{\mu}^{0i} \cdot \vec{\mu}^{if} \right)^2 + |\mu^{0i}|^2 |\mu^{if}|^2 \right]$$

$$\delta_{TP}^{3SM} = \frac{8|\mu^{0i}|^2 |\mu^{if}|^2}{\Delta E_i^2} \left[ 2 \left( \frac{\vec{\mu}^{0i} \cdot \vec{\mu}^{if}}{|\mu^{0i}| |\mu^{if}|} \right)^2 + 1 \right]$$

$$\delta_{TP}^{3SM} = \frac{8|\mu^{0i}|^2 |\mu^{if}|^2}{\Delta E_i^2} (2\cos^2\theta_{0i}^{if} + 1)$$

Next we shall consider the interference terms,  $\delta_{TP}^{ij}$ .

$$\delta_{TP}^{cross} = 48 \left( \frac{\mu_x^{0i} \mu_x^{if} \mu_x^{0j} \mu_x^{jf}}{\Delta E_i \Delta E_j} + \frac{\mu_y^{0i} \mu_y^{if} \mu_y^{0j} \mu_y^{jf}}{\Delta E_i \Delta E_j} + \frac{\mu_z^{0i} \mu_z^{if} \mu_z^{0j} \mu_z^{jf}}{\Delta E_i \Delta E_j} \right) \\ + 16 \left( \frac{\mu_x^{0i} \mu_y^{if} + \mu_y^{0i} \mu_x^{if}}{\Delta E_i} \times \frac{\mu_x^{0j} \mu_y^{jf} + \mu_y^{0j} \mu_x^{jf}}{\Delta E_j} \right) + 16 \left( \frac{\mu_y^{0i} \mu_z^{if} + \mu_z^{0i} \mu_y^{if}}{\Delta E_i} \times \frac{\mu_y^{0j} \mu_z^{jf} + \mu_z^{0j} \mu_y^{jf}}{\Delta E_j} \right) \\ + 16 \left( \frac{\mu_x^{0i} \mu_z^{if} + \mu_z^{0i} \mu_x^{if}}{\Delta E_i} \times \frac{\mu_x^{0j} \mu_z^{jf} + \mu_z^{0j} \mu_x^{jf}}{\Delta E_j} \right) + 16 \left( \frac{\mu_x^{0i} \mu_x^{if} \mu_y^{0j} \mu_y^{jf} + \mu_y^{0i} \mu_y^{if} \mu_z^{0j} \mu_z^{jf} + \mu_x^{0i} \mu_x^{if} \mu_z^{0j} \mu_z^{jf}}{\Delta E_i \Delta E_j} \right) \\ + 16 \left( \frac{\mu_x^{0j} \mu_x^{jf} \mu_y^{0i} \mu_y^{if} + \mu_y^{0j} \mu_y^{jf} \mu_z^{0i} \mu_z^{if} + \mu_x^{0j} \mu_x^{jf} \mu_z^{0i} \mu_z^{if}}{\Delta E_i \Delta E_j} \right)$$

$$\delta_{TP}^{cross} = \frac{16}{\Delta E_i \Delta E_j} \{ 3(\mu_x^{0i} \mu_x^{if} \mu_x^{0j} \mu_x^{jf} + \mu_y^{0i} \mu_y^{if} \mu_y^{0j} \mu_y^{jf} + \mu_z^{0i} \mu_z^{if} \mu_z^{0j} \mu_z^{jf}) + \mu_x^{0i} \mu_y^{if} \mu_x^{0j} \mu_y^{jf} + \mu_y^{0i} \mu_x^{if} \mu_x^{0j} \mu_y^{jf} \\ + \mu_x^{0i} \mu_y^{if} \mu_y^{0j} \mu_x^{jf} + \mu_y^{0i} \mu_x^{if} \mu_y^{0j} \mu_x^{jf} + \mu_y^{0i} \mu_z^{if} \mu_y^{0j} \mu_z^{jf} + \mu_z^{0i} \mu_y^{if} \mu_y^{0j} \mu_z^{jf} \\ + \mu_y^{0i} \mu_z^{if} \mu_z^{0j} \mu_y^{jf} + \mu_z^{0i} \mu_y^{if} \mu_z^{0j} \mu_y^{jf} + \mu_x^{0i} \mu_z^{if} \mu_x^{0j} \mu_z^{jf} + \mu_z^{0i} \mu_x^{if} \mu_x^{0j} \mu_z^{jf} \\ + \mu_x^{0i} \mu_z^{if} \mu_z^{0j} \mu_x^{jf} + \mu_z^{0i} \mu_x^{if} \mu_z^{0j} \mu_x^{jf} + \mu_y^{0i} \mu_x^{if} \mu_x^{0j} \mu_y^{jf} + \mu_x^{0i} \mu_y^{if} \mu_y^{0j} \mu_x^{jf} \\ + \mu_z^{0i} \mu_z^{if} \mu_y^{0j} \mu_y^{jf} + \mu_y^{0i} \mu_y^{if} \mu_z^{0j} \mu_z^{jf} + \mu_z^{0i} \mu_z^{if} \mu_x^{0j} \mu_x^{jf} + \mu_x^{0i} \mu_x^{if} \mu_z^{0j} \mu_z^{jf} \}$$

$$\begin{aligned}\delta_{TP}^{cross} &= \frac{16}{\Delta E_i \Delta E_j} \left[ 3(\mu_x^{0i} \mu_x^{if} + \mu_y^{0i} \mu_y^{if} + \mu_z^{0i} \mu_z^{if})(\mu_x^{0j} \mu_x^{jf} + \mu_y^{0j} \mu_y^{jf} + \mu_z^{0j} \mu_z^{jf}) \right] \\ &+ \frac{16}{\Delta E_i \Delta E_j} \{ -3(\mu_x^{0i} \mu_x^{if} \mu_y^{0j} \mu_y^{jf} + \mu_x^{0i} \mu_x^{if} \mu_z^{0j} \mu_z^{jf} + \mu_y^{0i} \mu_y^{if} \mu_x^{0j} \mu_x^{jf} + \mu_y^{0i} \mu_y^{if} \mu_z^{0j} \mu_z^{jf} \\ &+ \mu_z^{0i} \mu_z^{if} \mu_x^{0j} \mu_x^{jf} + \mu_z^{0i} \mu_z^{if} \mu_y^{0j} \mu_y^{jf}) + \mu_x^{0i} \mu_y^{if} \mu_x^{0j} \mu_y^{jf} + \mu_y^{0i} \mu_x^{if} \mu_x^{0j} \mu_y^{jf} \\ &+ \mu_x^{0i} \mu_y^{if} \mu_y^{0j} \mu_x^{jf} + \mu_y^{0i} \mu_x^{if} \mu_y^{0j} \mu_x^{jf} + \mu_y^{0i} \mu_z^{if} \mu_y^{0j} \mu_z^{jf} + \mu_z^{0i} \mu_y^{if} \mu_y^{0j} \mu_z^{jf} \\ &+ \mu_y^{0i} \mu_z^{if} \mu_z^{0j} \mu_y^{jf} + \mu_z^{0i} \mu_y^{if} \mu_z^{0j} \mu_y^{jf} + \mu_x^{0i} \mu_z^{if} \mu_x^{0j} \mu_z^{jf} + \mu_z^{0i} \mu_x^{if} \mu_x^{0j} \mu_z^{jf} \\ &+ \mu_x^{0i} \mu_z^{if} \mu_z^{0j} \mu_x^{jf} + \mu_z^{0i} \mu_x^{if} \mu_z^{0j} \mu_x^{jf} + \mu_y^{0i} \mu_y^{if} \mu_x^{0j} \mu_x^{jf} + \mu_x^{0i} \mu_x^{if} \mu_y^{0j} \mu_y^{jf} \\ &+ \mu_z^{0i} \mu_z^{if} \mu_y^{0j} \mu_y^{jf} + \mu_y^{0i} \mu_y^{if} \mu_z^{0j} \mu_z^{jf} + \mu_z^{0i} \mu_z^{if} \mu_x^{0j} \mu_x^{jf} + \mu_x^{0i} \mu_x^{if} \mu_z^{0j} \mu_z^{jf} \}\end{aligned}$$

$$\begin{aligned}\delta_{TP}^{cross} &= \frac{16}{\Delta E_i \Delta E_j} \left[ 3(\vec{\mu}^{0i} \cdot \vec{\mu}^{if})(\vec{\mu}^{0j} \cdot \vec{\mu}^{jf}) \right] \\ &+ \frac{16}{\Delta E_i \Delta E_j} \{ -2(\mu_x^{0i} \mu_x^{if} \mu_y^{0j} \mu_y^{jf} + \mu_x^{0i} \mu_x^{if} \mu_z^{0j} \mu_z^{jf} + \mu_y^{0i} \mu_y^{if} \mu_x^{0j} \mu_x^{jf} + \mu_y^{0i} \mu_y^{if} \mu_z^{0j} \mu_z^{jf} \\ &+ \mu_z^{0i} \mu_z^{if} \mu_x^{0j} \mu_x^{jf} + \mu_z^{0i} \mu_z^{if} \mu_y^{0j} \mu_y^{jf}) + \mu_x^{0i} \mu_y^{if} \mu_x^{0j} \mu_y^{jf} + \mu_y^{0i} \mu_x^{if} \mu_x^{0j} \mu_y^{jf} + \mu_x^{0i} \mu_y^{if} \mu_y^{0j} \mu_x^{jf} \\ &+ \mu_y^{0i} \mu_x^{if} \mu_y^{0j} \mu_x^{jf} + \mu_y^{0i} \mu_z^{if} \mu_y^{0j} \mu_z^{jf} + \mu_z^{0i} \mu_y^{if} \mu_y^{0j} \mu_z^{jf} + \mu_y^{0i} \mu_z^{if} \mu_z^{0j} \mu_y^{jf} + \mu_z^{0i} \mu_y^{if} \mu_z^{0j} \mu_y^{jf} \\ &+ \mu_x^{0i} \mu_z^{if} \mu_x^{0j} \mu_z^{jf} + \mu_z^{0i} \mu_x^{if} \mu_x^{0j} \mu_z^{jf} + \mu_x^{0i} \mu_z^{if} \mu_z^{0j} \mu_x^{jf} + \mu_z^{0i} \mu_x^{if} \mu_z^{0j} \mu_x^{jf} \}\end{aligned}$$

$$\begin{aligned}\delta_{TP}^{cross} &= \frac{16|\mu^{0i}||\mu^{if}||\mu^{0j}||\mu^{jf}|}{\Delta E_i \Delta E_j} \left[ 3 \frac{\vec{\mu}^{0i} \cdot \vec{\mu}^{if}}{|\mu^{0i}||\mu^{if}|} \frac{\vec{\mu}^{0j} \cdot \vec{\mu}^{jf}}{|\mu^{0j}||\mu^{jf}|} \right] \\ &+ \frac{16}{\Delta E_i \Delta E_j} \left[ \mu_x^{0i} \mu_x^{0j} (\mu_y^{if} \mu_y^{jf} + \mu_z^{if} \mu_z^{jf}) + \mu_y^{0i} \mu_y^{0j} (\mu_x^{if} \mu_x^{jf} + \mu_z^{if} \mu_z^{jf}) + \mu_z^{0i} \mu_z^{0j} (\mu_y^{if} \mu_y^{jf} + \mu_x^{if} \mu_x^{jf}) \right. \\ &\quad \left. - 2\{\mu_x^{0i} \mu_x^{if} (\mu_y^{0j} \mu_y^{jf} + \mu_z^{0j} \mu_z^{jf}) + \mu_y^{0i} \mu_y^{if} (\mu_x^{0j} \mu_x^{jf} + \mu_z^{0j} \mu_z^{jf}) + \mu_z^{0i} \mu_z^{if} (\mu_x^{0j} \mu_x^{jf} + \mu_y^{0j} \mu_y^{jf})\} \right. \\ &\quad \left. + \mu_y^{0i} \mu_x^{if} \mu_x^{0j} \mu_y^{jf} + \mu_x^{0i} \mu_y^{if} \mu_y^{0j} \mu_x^{jf} + \mu_z^{0i} \mu_y^{if} \mu_y^{0j} \mu_z^{jf} + \mu_y^{0i} \mu_z^{if} \mu_z^{0j} \mu_y^{jf} + \mu_z^{0i} \mu_x^{if} \mu_x^{0j} \mu_z^{jf} + \mu_x^{0i} \mu_z^{if} \mu_z^{0j} \mu_x^{jf} \right]\end{aligned}$$

$$\begin{aligned}\delta_{TP}^{cross} &= \frac{16|\mu^{0i}||\mu^{if}||\mu^{0j}||\mu^{jf}|}{\Delta E_i \Delta E_j} \left( 3 \cos \theta_{0i}^{if} \cos \theta_{0j}^{jf} \right) \\ &+ \frac{16}{\Delta E_i \Delta E_j} \left[ (\mu_x^{0i} \mu_x^{0j} + \mu_y^{0i} \mu_y^{0j} + \mu_z^{0i} \mu_z^{0j})(\mu_x^{if} \mu_x^{jf} + \mu_y^{if} \mu_y^{jf} + \mu_z^{if} \mu_z^{jf}) \right. \\ &\quad - (\mu_x^{0i} \mu_x^{0j} \mu_x^{if} \mu_x^{jf} + \mu_y^{0i} \mu_y^{0j} \mu_y^{if} \mu_y^{jf} + \mu_z^{0i} \mu_z^{0j} \mu_z^{if} \mu_z^{jf}) \\ &\quad - 2(\mu_x^{0i} \mu_x^{if} + \mu_y^{0i} \mu_y^{if} + \mu_z^{0i} \mu_z^{if})(\mu_x^{0j} \mu_x^{jf} + \mu_y^{0j} \mu_y^{jf} + \mu_z^{0j} \mu_z^{jf}) \\ &\quad + 2(\mu_x^{0i} \mu_x^{0j} \mu_x^{if} \mu_x^{jf} + \mu_y^{0i} \mu_y^{0j} \mu_y^{if} \mu_y^{jf} + \mu_z^{0i} \mu_z^{0j} \mu_z^{if} \mu_z^{jf}) + \mu_y^{0i} \mu_x^{0j} \mu_x^{if} \mu_y^{jf} \\ &\quad \left. + \mu_x^{0i} \mu_y^{0j} \mu_x^{if} \mu_y^{jf} + \mu_z^{0i} \mu_y^{0j} \mu_y^{if} \mu_z^{jf} + \mu_y^{0i} \mu_z^{0j} \mu_z^{if} \mu_y^{jf} + \mu_z^{0i} \mu_x^{0j} \mu_x^{if} \mu_z^{jf} + \mu_x^{0i} \mu_z^{0j} \mu_z^{if} \mu_x^{jf} \right]\end{aligned}$$

$$\delta_{TP}^{cross} = \frac{16|\mu^{0i}||\mu^{if}||\mu^{0j}||\mu^{jf}|}{\Delta E_i \Delta E_j} \left( 3\cos\theta_{0i}^{if}\cos\theta_{0j}^{jf} \right) + \frac{16}{\Delta E_i \Delta E_j} \left[ \left( \vec{\mu}^{0i} \cdot \vec{\mu}^{0j} \right) \left( \vec{\mu}^{if} \cdot \vec{\mu}^{jf} \right) - 2 \left( \vec{\mu}^{0i} \cdot \vec{\mu}^{if} \right) \left( \vec{\mu}^{0j} \cdot \vec{\mu}^{jf} \right) + \mu_x^{0i}\mu_x^{0j}\mu_x^{if}\mu_x^{jf} + \mu_y^{0i}\mu_y^{0j}\mu_y^{if}\mu_y^{jf} + \mu_z^{0i}\mu_z^{0j}\mu_z^{if}\mu_z^{jf} + \mu_y^{0i}\mu_x^{if}\mu_x^{0j}\mu_y^{jf} + \mu_x^{0i}\mu_y^{if}\mu_y^{0j}\mu_x^{jf} + \mu_z^{0i}\mu_y^{if}\mu_y^{0j}\mu_z^{jf} + \mu_y^{0i}\mu_z^{if}\mu_z^{0j}\mu_y^{jf} + \mu_z^{0i}\mu_x^{if}\mu_x^{0j}\mu_z^{jf} + \mu_x^{0i}\mu_z^{if}\mu_z^{0j}\mu_x^{jf} \right]$$

$$\delta_{TP}^{cross} = \frac{16|\mu^{0i}||\mu^{if}||\mu^{0j}||\mu^{jf}|}{\Delta E_i \Delta E_j} \left( 3\cos\theta_{0i}^{if}\cos\theta_{0j}^{jf} \right) + \frac{16|\mu^{0i}||\mu^{if}||\mu^{0j}||\mu^{jf}|}{\Delta E_i \Delta E_j} \left[ \frac{\vec{\mu}^{0i} \cdot \vec{\mu}^{0j}}{|\mu^{0i}||\mu^{0j}|} \frac{\vec{\mu}^{if} \cdot \vec{\mu}^{jf}}{|\mu^{if}||\mu^{jf}|} - 2 \frac{\vec{\mu}^{0i} \cdot \vec{\mu}^{if}}{|\mu^{0i}||\mu^{if}|} \frac{\vec{\mu}^{0j} \cdot \vec{\mu}^{jf}}{|\mu^{0j}||\mu^{jf}|} \right] + \frac{16}{\Delta E_i \Delta E_j} \left[ \mu_x^{0i}\mu_x^{jf}(\mu_x^{0j}\mu_x^{if} + \mu_y^{0j}\mu_y^{if} + \mu_z^{0j}\mu_z^{if}) + \mu_y^{0i}\mu_y^{jf}(\mu_x^{0j}\mu_x^{if} + \mu_y^{0j}\mu_y^{if} + \mu_z^{0j}\mu_z^{if}) + \mu_z^{0i}\mu_z^{jf}(\mu_x^{0j}\mu_x^{if} + \mu_y^{0j}\mu_y^{if} + \mu_z^{0j}\mu_z^{if}) \right]$$

$$\delta_{TP}^{cross} = \frac{16|\mu^{0i}||\mu^{if}||\mu^{0j}||\mu^{jf}|}{\Delta E_i \Delta E_j} \left( \cos\theta_{0i}^{if}\cos\theta_{0j}^{jf} + \cos\theta_{0i}^{0j}\cos\theta_{if}^{jf} \right) + \frac{16}{\Delta E_i \Delta E_j} (\mu_x^{0j}\mu_x^{if} + \mu_y^{0j}\mu_y^{if} + \mu_z^{0j}\mu_z^{if})(\mu_x^{0i}\mu_x^{jf} + \mu_y^{0i}\mu_y^{jf} + \mu_z^{0i}\mu_z^{jf})$$

$$\delta_{TP}^{cross} = \frac{16|\mu^{0i}||\mu^{if}||\mu^{0j}||\mu^{jf}|}{\Delta E_i \Delta E_j} \left( \cos\theta_{0i}^{if}\cos\theta_{0j}^{jf} + \cos\theta_{0i}^{0j}\cos\theta_{if}^{jf} + \frac{\vec{\mu}^{0j} \cdot \vec{\mu}^{if}}{|\mu^{0j}||\mu^{if}|} \frac{\vec{\mu}^{0i} \cdot \vec{\mu}^{jf}}{|\mu^{0i}||\mu^{jf}|} \right)$$

$$\delta_{TP}^{cross} = \frac{16|\mu^{0i}||\mu^{0j}||\mu^{if}||\mu^{jf}|}{\Delta E_i \Delta E_j} (\cos\theta_{0i}^{if}\cos\theta_{0j}^{jf} + \cos\theta_{0i}^{0j}\cos\theta_{if}^{jf} + \cos\theta_{0j}^{if}\cos\theta_{0i}^{jf})$$

Here  $\delta_{TP}^{ij} = \delta_{TP}^{ji}$ . Therefore,  $\delta_{TP}^{cross} = \delta_{TP}^{ij} + \delta_{TP}^{ji} = 2\delta_{TP}^{ij}$  This means -

$$\delta_{TP}^{ij} = \frac{8|\mu^{0i}||\mu^{0j}||\mu^{if}||\mu^{jf}|}{\Delta E_i \Delta E_j} (\cos\theta_{0i}^{if}\cos\theta_{0j}^{jf} + \cos\theta_{0i}^{0j}\cos\theta_{if}^{jf} + \cos\theta_{0i}^{jf}\cos\theta_{0j}^{if})$$

This expression can be reduced to 3SM formula by putting  $i = j$ . Therefore the overall  $\delta_{TP}$  can be written as -

$$\delta_{TP} = \sum_i \sum_j \frac{8|\mu^{0i}||\mu^{0j}||\mu^{if}||\mu^{jf}|}{\Delta E_i \Delta E_j} (\cos\theta_{0i}^{if}\cos\theta_{0j}^{jf} + \cos\theta_{0i}^{0j}\cos\theta_{if}^{jf} + \cos\theta_{0i}^{jf}\cos\theta_{0j}^{if})$$

This is the required Generalized Few-State Model (GFSM) formula for TPA transition probability.



**Table 1. a) Optimized geometry of ortho-betain in gas and water media at CAM-B3LYP/6-311++G(d,p) level of theory**

| Atom | Gas medium |          |          | Water medium |          |          |
|------|------------|----------|----------|--------------|----------|----------|
|      | X          | Y        | Z        | X            | Y        | Z        |
| C    | -1.44332   | 0.94470  | 0.49258  | -1.43005     | 0.75887  | 0.79484  |
| C    | -2.82159   | 0.99344  | 0.44507  | -2.80516     | 0.82108  | 0.78842  |
| C    | -3.54203   | -0.08957 | -0.02474 | -3.52323     | -0.08289 | 0.01855  |
| C    | -2.84367   | -1.20979 | -0.46185 | -2.83893     | -1.02735 | -0.73460 |
| C    | -1.47263   | -1.21034 | -0.42397 | -1.46351     | -1.04107 | -0.70513 |
| N    | -0.77534   | -0.15624 | 0.07080  | -0.78112     | -0.16603 | 0.06082  |
| H    | -4.62340   | -0.06361 | -0.06180 | -4.61004     | -0.05159 | 0.00449  |
| H    | -0.82175   | 1.75902  | 0.82962  | -0.80815     | 1.42050  | 1.38564  |
| H    | -3.31516   | 1.89090  | 0.79218  | -3.30238     | 1.57145  | 1.39539  |
| H    | -3.35534   | -2.07543 | -0.85979 | -3.36151     | -1.74811 | -1.35595 |
| H    | -0.87915   | -2.02649 | -0.80413 | -0.86628     | -1.73386 | -1.28956 |
| C    | 0.65218    | -0.18498 | 0.10460  | 0.66556      | -0.19164 | 0.07848  |
| C    | 1.30425    | -1.39672 | 0.35877  | 1.30894      | -1.37125 | 0.42579  |
| C    | 1.36010    | 1.04013  | -0.18496 | 1.34725      | 1.00753  | -0.29399 |
| C    | 2.67360    | -1.47913 | 0.30682  | 2.69191      | -1.43489 | 0.42405  |
| H    | 0.72653    | -2.27046 | 0.64201  | 0.71673      | -2.23899 | 0.71005  |
| C    | 2.78659    | 0.87240  | -0.26664 | 2.76894      | 0.88311  | -0.28397 |
| C    | 3.40580    | -0.32141 | -0.02526 | 3.40877      | -0.28882 | 0.06225  |
| H    | 3.17786    | -2.40840 | 0.53547  | 3.20220      | -2.35036 | 0.70331  |
| H    | 3.35401    | 1.76192  | -0.51201 | 3.34336      | 1.76156  | -0.56727 |
| H    | 4.48796    | -0.37750 | -0.07810 | 4.49628      | -0.31945 | 0.05381  |
| O    | 0.79002    | 2.14391  | -0.36269 | 0.73434      | 2.08187  | -0.61422 |

**Table 1. b) Optimized geometry of ortho-betain in acetonitrile and THF media at CAM-B3LYP/6-311++G(d,p) level of theory**

| Atom | Acetonitrile medium |          |          | THF medium |          |          |
|------|---------------------|----------|----------|------------|----------|----------|
|      | X                   | Y        | Z        | X          | Y        | Z        |
| C    | -1.42975            | 0.76557  | 0.78607  | -1.43126   | 0.84308  | 0.67663  |
| C    | -2.80500            | 0.82837  | 0.77745  | -2.80714   | 0.90485  | 0.65784  |
| C    | -3.52297            | -0.08305 | 0.01666  | -3.52640   | -0.08454 | 0.00675  |
| C    | -2.83830            | -1.03565 | -0.72595 | -2.84094   | -1.11465 | -0.62347 |
| C    | -1.46302            | -1.04905 | -0.69550 | -1.46698   | -1.12373 | -0.59285 |
| N    | -0.78050            | -0.16742 | 0.06278  | -0.77977   | -0.16596 | 0.06452  |
| H    | -4.60958            | -0.05118 | 0.00104  | -4.60799   | -0.05322 | -0.01409 |
| H    | -0.80883            | 1.43316  | 1.37041  | -0.81030   | 1.57326  | 1.16822  |
| H    | -3.30217            | 1.58568  | 1.37553  | -3.30085   | 1.72354  | 1.16195  |
| H    | -3.36039            | -1.76220 | -1.34070 | -3.36074   | -1.90032 | -1.15315 |
| H    | -0.86643            | -1.74688 | -1.27399 | -0.87199   | -1.87275 | -1.09298 |
| C    | 0.66569             | -0.19239 | 0.08034  | 0.66280    | -0.19112 | 0.08622  |
| C    | 1.31090             | -1.37166 | 0.42605  | 1.30990    | -1.37899 | 0.40565  |
| C    | 1.34555             | 1.00836  | -0.29253 | 1.34764    | 1.01945  | -0.26448 |
| C    | 2.69370             | -1.43393 | 0.42207  | 2.68973    | -1.44758 | 0.38921  |
| H    | 0.72131             | -2.24023 | 0.71260  | 0.72410    | -2.24756 | 0.68802  |
| C    | 2.76779             | 0.88432  | -0.28590 | 2.77212    | 0.88218  | -0.27774 |
| C    | 3.40888             | -0.28695 | 0.05866  | 3.40788    | -0.29632 | 0.03771  |
| H    | 3.20540             | -2.34860 | 0.70096  | 3.19874    | -2.36550 | 0.65154  |
| H    | 3.34057             | 1.76352  | -0.56975 | 3.34310    | 1.76339  | -0.54817 |
| H    | 4.49632             | -0.31669 | 0.04850  | 4.49226    | -0.33243 | 0.01769  |
| O    | 0.73081             | 2.08146  | -0.60858 | 0.74348    | 2.09970  | -0.54244 |

**Table 2. a) Optimized geometry of Para-betain in Gas and Water media at CAM-B3LYP/6-311++G(d,p) level of theory**

| Atom | Gas medium |          |          | Water medium |          |          |
|------|------------|----------|----------|--------------|----------|----------|
|      | X          | Y        | Z        | X            | Y        | Z        |
| C    | -1.78270   | -1.11850 | -0.34556 | -1.78287     | -1.06619 | -0.48198 |
| C    | -3.15527   | -1.14221 | -0.32663 | -3.15753     | -1.09633 | -0.47598 |
| C    | -3.87433   | 0.00005  | 0.00004  | -3.86171     | 0.00003  | 0.00004  |
| C    | -3.15519   | 1.14227  | 0.32668  | -3.15748     | 1.09636  | 0.47603  |
| C    | -1.78262   | 1.11847  | 0.34555  | -1.78282     | 1.06618  | 0.48198  |
| N    | -1.07952   | -0.00004 | -0.00001 | -1.10857     | -0.00001 | -0.00002 |
| H    | -4.95559   | 0.00008  | 0.00006  | -4.94361     | 0.00004  | 0.00006  |
| H    | -1.19263   | -1.95914 | -0.67189 | -1.18051     | -1.86690 | -0.88266 |
| H    | -3.65535   | -2.05977 | -0.60678 | -3.66322     | -1.96837 | -0.86548 |
| H    | -3.65520   | 2.05986  | 0.60683  | -3.66313     | 1.96843  | 0.86555  |
| H    | -1.19248   | 1.95908  | 0.67184  | -1.18042     | 1.86688  | 0.88262  |
| C    | 0.32399    | -0.00005 | -0.00005 | 0.33347      | -0.00003 | -0.00005 |
| C    | 1.04293    | -1.17527 | 0.31840  | 1.03249      | -1.11407 | 0.46407  |
| C    | 1.04290    | 1.17523  | -0.31837 | 1.03248      | 1.11405  | -0.46409 |
| C    | 2.40236    | -1.18162 | 0.32726  | 2.40891      | -1.11632 | 0.46562  |
| H    | 0.50917    | -2.06930 | 0.62306  | 0.49313      | -1.97212 | 0.85053  |
| C    | 2.40232    | 1.18160  | -0.32734 | 2.40890      | 1.11628  | -0.46570 |
| H    | 0.50909    | 2.06932  | -0.62280 | 0.49312      | 1.97216  | -0.85041 |
| C    | 3.18751    | -0.00011 | -0.00044 | 3.17808      | -0.00011 | -0.00026 |
| H    | 2.95180    | -2.06996 | 0.61327  | 2.94575      | -1.97955 | 0.84254  |
| H    | 2.95172    | 2.07005  | -0.61306 | 2.94574      | 1.97961  | -0.84241 |
| O    | 4.42184    | 0.00011  | 0.00029  | 4.45019      | 0.00009  | 0.00021  |

**Table 2. b) Optimized geometry of Para-betain in acetonitrile and THF media at CAM-B3LYP/6-311++G(d,p) level of theory**

| Atom | Acetonitrile medium |          |          | THF medium |          |          |
|------|---------------------|----------|----------|------------|----------|----------|
|      | X                   | Y        | Z        | X          | Y        | Z        |
| C    | -1.78119            | -1.05587 | -0.50708 | -1.78260   | -1.07435 | -0.46239 |
| C    | -3.15651            | -1.08528 | -0.50278 | -3.15733   | -1.10499 | -0.45319 |
| C    | -3.86037            | 0.00000  | 0.00002  | -3.86314   | 0.00002  | 0.00003  |
| C    | -3.15652            | 1.08529  | 0.50282  | -3.15729   | 1.10501  | 0.45322  |
| C    | -1.78119            | 1.05586  | 0.50709  | -1.78256   | 1.07434  | 0.46239  |
| N    | -1.10893            | -0.00001 | 0.00000  | -1.10518   | -0.00001 | -0.00001 |
| H    | -4.94744            | 0.00000  | 0.00001  | -4.94505   | 0.00003  | 0.00005  |
| H    | -1.17868            | -1.85301 | -0.92903 | -1.18071   | -1.87983 | -0.85384 |
| H    | -3.66480            | -1.95159 | -0.91506 | -3.66247   | -1.98475 | -0.82625 |
| H    | -3.66479            | 1.95161  | 0.91510  | -3.66240   | 1.98479  | 0.82630  |
| H    | -1.17867            | 1.85300  | 0.92902  | -1.18065   | 1.87981  | 0.85381  |
| C    | 0.33489             | 0.00000  | 0.00000  | 0.33257    | -0.00002 | -0.00003 |
| C    | 1.03086             | -1.10288 | 0.49063  | 1.03407    | -1.12461 | 0.44204  |
| C    | 1.03086             | 1.10288  | -0.49063 | 1.03406    | 1.12460  | -0.44205 |
| C    | 2.40878             | -1.10447 | 0.49175  | 2.40780    | -1.12740 | 0.44526  |
| H    | 0.48895             | -1.95534 | 0.89500  | 0.49522    | -1.98882 | 0.81611  |
| C    | 2.40877             | 1.10448  | -0.49176 | 2.40779    | 1.12738  | -0.44532 |
| H    | 0.48894             | 1.95535  | -0.89498 | 0.49520    | 1.98885  | -0.81601 |
| C    | 3.17332             | -0.00001 | -0.00004 | 3.18074    | -0.00008 | -0.00021 |
| H    | 2.94777             | -1.96074 | 0.88807  | 2.94696    | -1.99473 | 0.80842  |
| H    | 2.94776             | 1.96076  | -0.88806 | 2.94694    | 1.99477  | -0.80832 |
| O    | 4.45167             | 0.00001  | -0.00001 | 4.44483    | 0.00007  | 0.00016  |

**Table 3. Excited-Excited states transition moments of ortho- and para-betain in gas, THF, CH<sub>3</sub>CN and water medium (calculated at CAMB3LYP/aug-cc-pVDZ level of theory)**

| System       | Solvents           | $\mu^{11}$ in (a.u.) |         |         |        | $\mu^{12}$ in (a.u.) |         |         |        |
|--------------|--------------------|----------------------|---------|---------|--------|----------------------|---------|---------|--------|
|              |                    | x                    | y       | z       | Total  | x                    | y       | z       | Total  |
| ortho-betain | Gas                | 2.1340               | -0.1300 | -1.1020 | 2.4050 | 0.1030               | 0.0410  | -0.2310 | 0.2560 |
|              |                    | -0.1030              | -0.0410 | 0.2310  | 0.2560 | 1.8920               | -0.1410 | -1.7940 | 2.6110 |
|              | THF                | 3.5570               | -0.0800 | -1.7510 | 3.9650 | -0.0060              | -0.2380 | -0.1690 | 0.2920 |
|              |                    | 0.0060               | 0.2380  | 0.1690  | 0.2920 | 3.9200               | -0.0920 | -2.0670 | 4.4330 |
|              | CH <sub>3</sub> CN | 3.9090               | -0.0430 | -1.9190 | 4.3550 | -0.0460              | 0.2650  | 0.1240  | 0.2960 |
|              |                    | 0.0460               | -0.2650 | -0.1240 | 0.2960 | 4.2220               | -0.0640 | -2.1320 | 4.7300 |
|              | Water              | 3.9320               | -0.0320 | -1.9390 | 4.3840 | -0.0530              | 0.2670  | 0.1200  | 0.2970 |
|              |                    | 0.0530               | -0.2670 | -0.1200 | 0.2970 | 4.2370               | -0.0530 | -2.1400 | 4.7470 |
| para-betain  | Gas                | 0.0000               | 0.0000  | -0.9900 | 0.9900 | 0.0830               | -0.2560 | 0.0000  | 0.2690 |
|              |                    | -0.0830              | 0.2560  | 0.0000  | 0.2690 | 0.0000               | 0.0000  | -2.7590 | 2.7590 |
|              | THF                | 0.0000               | 0.0000  | -3.8790 | 3.8790 | 0.2230               | -0.1950 | 0.0000  | 0.2970 |
|              |                    | -0.2240              | 0.1950  | 0.0000  | 0.2970 | 0.0000               | 0.0000  | -5.2150 | 5.2150 |
|              | CH <sub>3</sub> CN | 0.0000               | 0.0000  | -4.5830 | 4.5830 | 0.2270               | 0.1830  | 0.0000  | 0.2920 |
|              |                    | -0.2270              | -0.1830 | 0.0000  | 0.2920 | 0.0000               | 0.0000  | -5.5590 | 5.5590 |
|              | Water              | 0.0000               | 0.0000  | -4.3720 | 4.3720 | 0.2400               | -0.1720 | 0.0000  | 0.2950 |
|              |                    | -0.2400              | 0.1720  | 0.0000  | 0.2950 | 0.0000               | 0.0000  | -5.4470 | 5.4470 |

**Table 4. SOS results (in 10<sup>4</sup> a.u. order) involving different number of intermediate states - Test of convergence behaviour**

| No. of intermediate     | TPA transition probability (in a.u.) |                   |                   |                   |
|-------------------------|--------------------------------------|-------------------|-------------------|-------------------|
|                         | o-betain                             |                   | p-betain          |                   |
|                         | 1st excited state                    | 2nd excited state | 1st excited state | 2nd excited state |
| 1                       | 17.05                                | 2.96              | 9.70              | 0.11              |
| 2                       | 17.93                                | 1.26              | 9.60              | 0.87              |
| 3                       | 17.95                                | 1.34              | 9.89              | 0.87              |
| 4                       | 18.72                                | 1.52              | 9.88              | 0.87              |
| 5                       | 18.72                                | 1.52              | 9.90              | 0.84              |
| 6                       | 17.66                                | 1.59              | 10.09             | 0.81              |
| 7                       | 13.54                                | 1.84              | 10.06             | 0.81              |
| 8                       | 13.22                                | 1.84              | 9.99              | 0.82              |
| Response theory results | 13.10                                | 0.90              | 11.40             | 0.93              |

**Table 5. Theoretical and experimental excitation energy (in eV) of o- and p-betain in water medium**

| systems  | Excited states | Ground to excited state excitation energy (in eV) calculated using aug-cc-pVDZ basis set and following functionals |        | Experimental excitation energy (in eV) |
|----------|----------------|--------------------------------------------------------------------------------------------------------------------|--------|----------------------------------------|
|          |                | CAMB3LYP                                                                                                           | LC-PBE |                                        |
| o-betain | 1              | 2.934                                                                                                              | 3.551  | 3.280                                  |
|          |                | 4.072                                                                                                              | 4.612  |                                        |
| p-betain | 2              | 3.048                                                                                                              | 3.651  | 3.397                                  |
|          |                | 4.030                                                                                                              | 4.432  |                                        |
